# Supplementary material for: Mixed systems to assist enzymatic ring opening polymerization of lactide stereoisomers
Source: Royal Society of Chemistry journal article supplement (doi:10.1039/c5ra18954c), 2015-01-01

## Mixed systems to assist enzymatic ring opening polymerization of lactide stereoisomers

S. W. Duchiron,<sup>a</sup> E. Pollet,<sup>a</sup> S. Givry,<sup>b</sup> and L. Avérous<sup>a</sup>

TGA Analysis of formed PLA

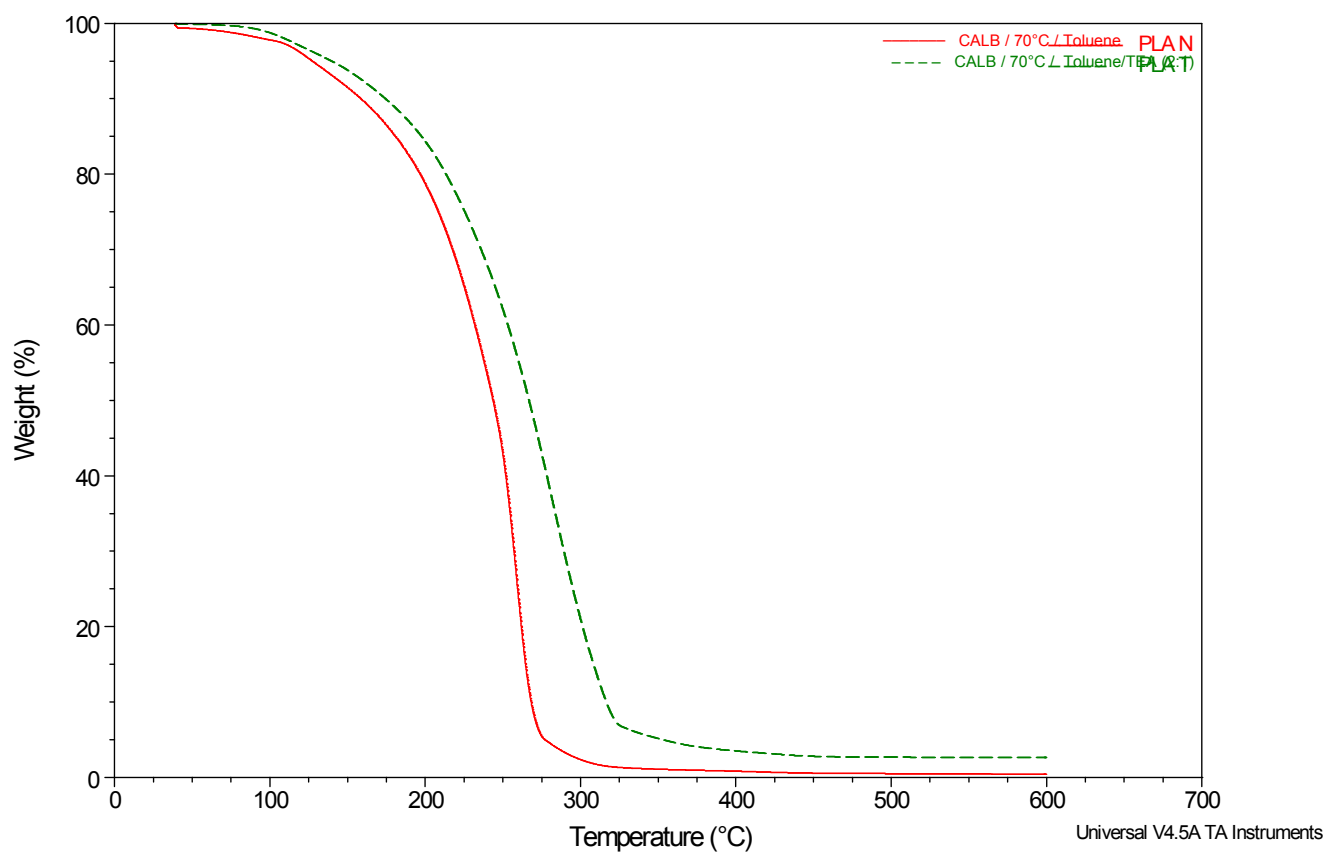

Example of DSC of PLA sample synthesized by enzymatic ROP of Lactide

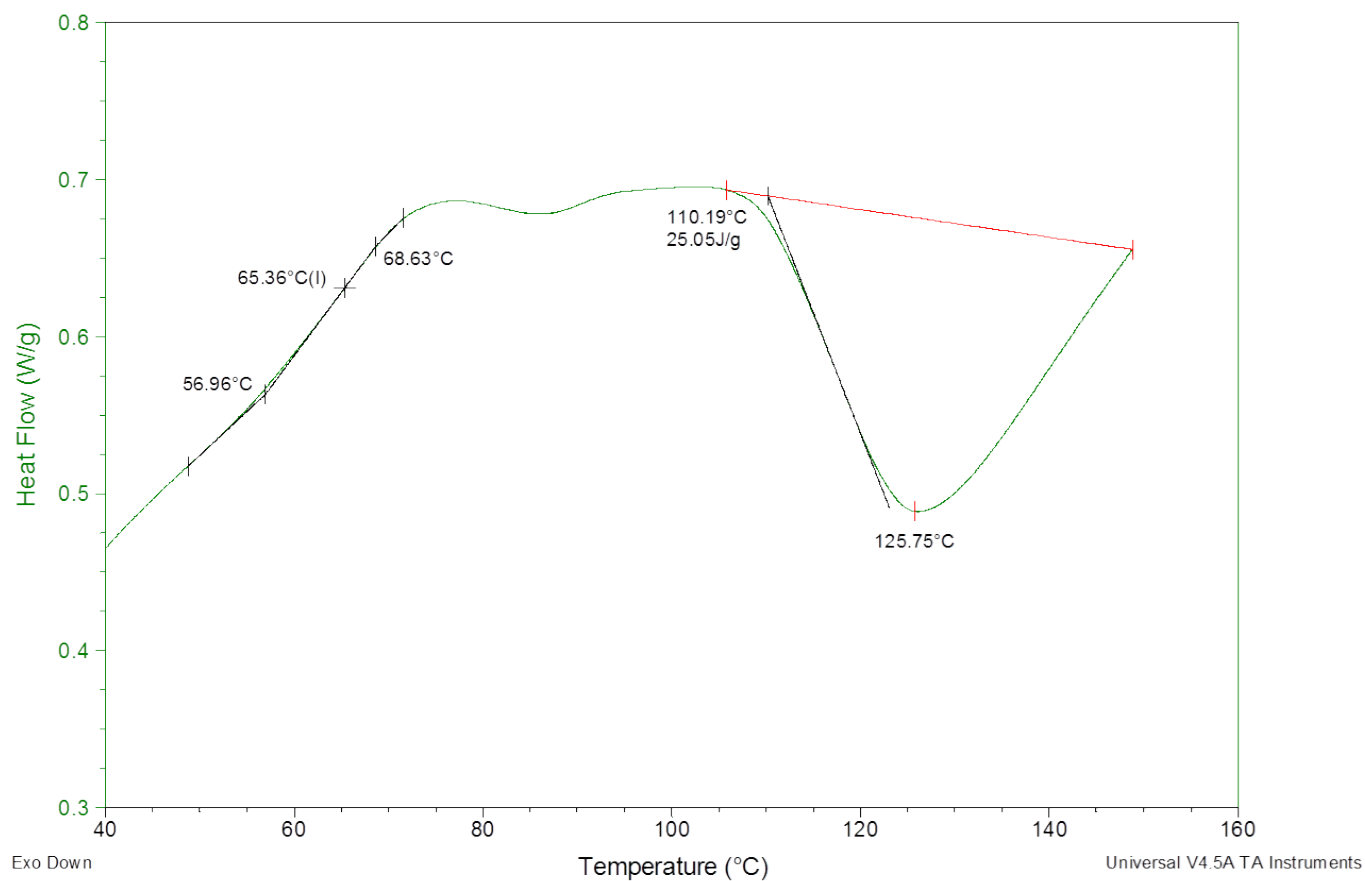

Example of  $^1\text{H}$  NMR of PLA sample synthesized by enzymatic ROP of Lactide

SpinWorks 4:

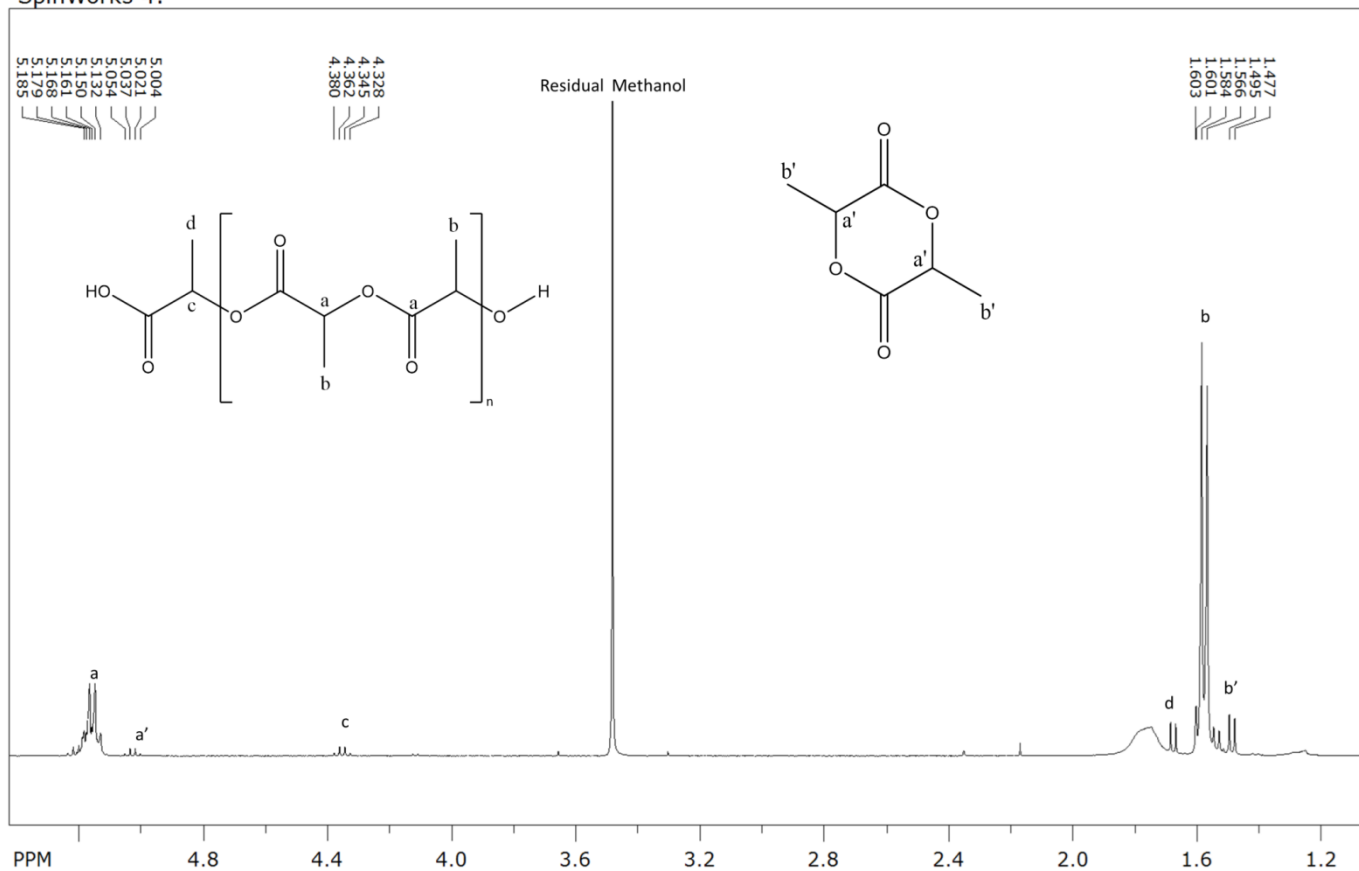

Example of IR spectrum of PLA sample synthesized by enzymatic ROP of Lactide

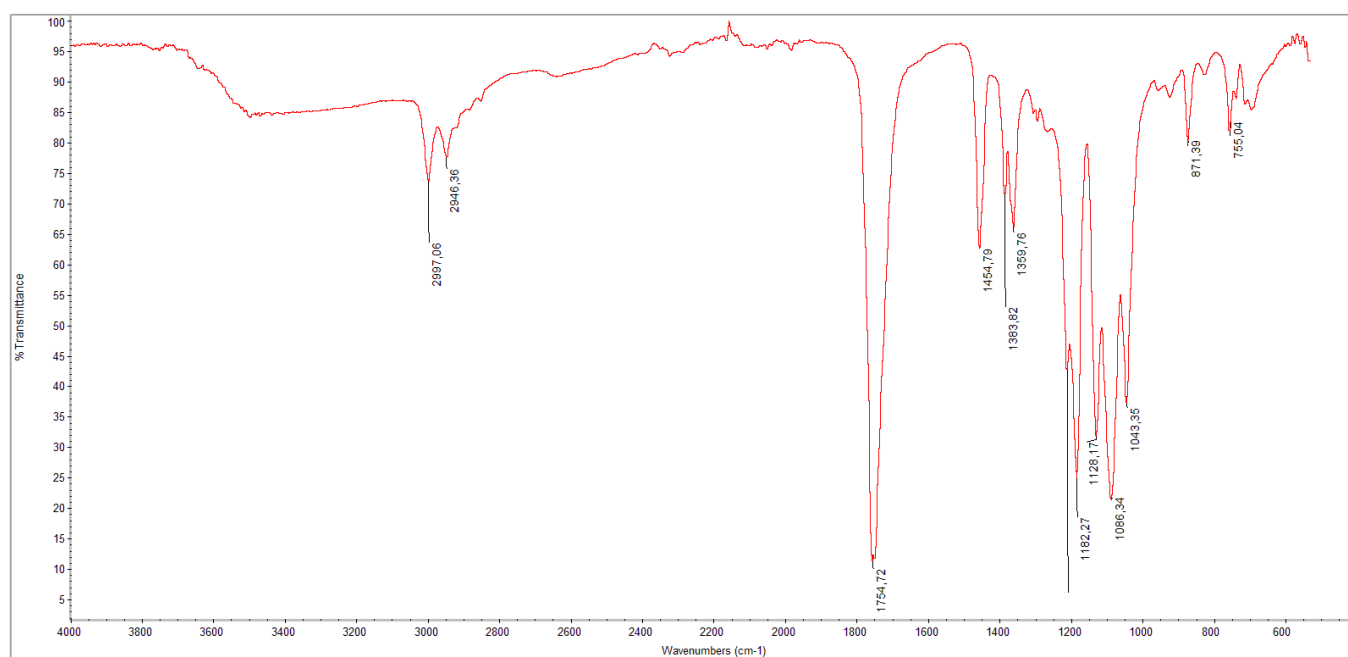

Supplement: c5ra18954c1.pdf [file c5ra18954c1.pdf]
